# Supplementary material for: Southern California Megacity CO2, CH4, and CO flux estimatesusing remote sensing and a Lagrangian model
Source: Copernicus journal article supplement (doi:10.5194/acp-2018-517), 2018-05-31
Supplement: Supplementary file [file acp-2018-517-AC1-supplement.pdf]

# Author responses to Southern California Megacity CO<sub>2</sub>, CH<sub>4</sub>, and CO flux estimates using remote sensing and a Lagrangian model

(<https://doi.org/10.5194/acp-2018-517>)

Jacob K. Hedelius, Junjie Liu, Tomohiro Oda, Shamil Maksyutov, Coleen M. Roehl, Laura T. Iraci, James R. Podolske, Patrick W. Hillyard, Jianming Liang, Kevin R. Gurney, Debra Wunch, and Paul O. Wennberg

We thank the referees for reviewing this manuscript. Their comments and our responses are below.

Referee comments are in blue with a gray vertical line on the left side.

Our responses are in black.

~~Edits~~ Changes to the manuscript are shown with tracked changes in red.

While preparing responses to the referees we also made a necessary improvement to the inversion which altered the flux results. Our revised manuscript reflects these changes.

**R1C1** - My main concern is regarding the a priori flux estimates used in this work, particularly given the acknowledged existing higher accuracy inventories. I understand that the methodology was designed to be applicable globally, but it is not clear how much the quality of the inversion suffers from this goal.

How different are the CO<sub>2</sub> fluxes using the modified ODIAC as compared to using Hestia-LA? Lauvaux et al (2016) used a different Hestia data product and tower measurements in a substantially smaller city; it isn't obvious that the comparison holds over SoCAB with remote sensing data.

We made a sensitivity test using the latest version of Hestia (V2.5). The forward model was more accurate using Hestia V2.5, and the overall flux inversion differed by less than 10%, in agreement with previous studies.

Added to Sect 2.2

As a sensitivity test we also derive a flux based on Hestia-LA 2.5 over the region it is available and Vulcan 3.0 is used for the rest of the area in the U.S. These were gridded to the same scale as the ODIAC.

Added to Sect 4.3

We note that the correlation between the forward model data and TCCON is slightly higher with Hestia than ODIAC, and there are fewer outliers that differ by a factor of 10x or more. However, the flux estimate of  $110 \pm 28$  is similar to the posterior flux estimate using ODIAC.

43  
44  
45  
46  
47  
48  
49  
50  
51  
52  
53  
54  
55  
56  
57  
58  
59  
60  
61  
62  
63  
64  
65  
66  
67  
68  
69  
70  
71  
72  
73  
74  
75  
76  
77  
78  
79  
80  
81  
82  
83  
84

**R1C2** - Given a lack of information on landfills and the variability in the relationship between nightlights and emissions, is the custom tuned CH<sub>4</sub> inventory used in this work functionally more globally scalable than existing emissions inventories?

We have clarified that the CH<sub>4</sub> inventory we made in this study is not scalable beyond a national level.

A detailed CH<sub>4</sub> inventory is also available for the SoCAB, which we do not use because it would be difficult to scale (Carranza et al., 2018). ~~We make our own 0.01°×0.01°~~ For the U.S. the Harvard-EPA inventory is already available at 0.1°×0.1° (Maasakkers et al., 2016), and globally the EDGAR inventory is available at 0.1°×0.1° (EC-JRC/PBL, 2009). ~~We make our own 30 arcsec × 30 arcsec~~ methane prior using landfills, nightlights, expected total emissions, and the Harvard-Environmental Protection Agency (EPA) United States (U.S.) inventory (Maasakkers et al., 2016) shown in Fig. 1. ~~A more detailed CH<sub>4</sub> inventory is also available for the SoCAB, which we do not use because it would be difficult to scale globally~~ Due to a lack of information outside the U.S. on point sources, such as landfills, our methane prior is also not scalable beyond a national level. For our methane prior we first ~~(Carranza et al., 2018).~~ ~~First, we~~ distribute emissions from landfills as point sources (available 2010–2015, <https://ghgdata.epa.gov/ghgp/main.do>) and use 2015 emissions for 2016.

**R1C3** - Additionally, this paper should include a data availability section as per the ACP data policy: [https://www.atmospheric-chemistry-and-physics.net/about/data\\_policy.html](https://www.atmospheric-chemistry-and-physics.net/about/data_policy.html) All data used in this study are publically available. No new data were generated. The data availability section is located between the Conclusions section and Appendix (page 18 of the original manuscript).

**R1C4** - Figure 1 & 2: The boundaries drawn on the map in blue and black should be described in the figure captions.

Thanks. We've added the following to both figure captions:

The black lines are coastlines and the geopolitical boundaries of the SoCAB. Blue lines are county borders.

**R1C5** - Figure 5: The grey and blue lines should be described in the caption.

We've added the following to the figure caption:

For every 5th sounding the set of backtrajectories is shown in gray. Backtrajectories originating from the AFRC site are shown in blue. Coastlines and the geopolitical boundaries of the SoCAB are shown in black. County borders are shown in blue.

85

86 **R1C6 - P4 L5:** Please provide more detail or a citation regarding CO emissions as 1%  
87 of CO<sub>2</sub>.

88 We added a citation for Wunch et al., 2009.

89

90 This same prior is used for CO, but total emissions are 1 % of CO<sub>2</sub> emissions on a molar basis  
91 (0.6 % of mass) based on the results of Wunch et al. (2009).

92

93

94 **R1C7 - P5 L18:** Is the assumption that the flux from vegetation is balanced based on  
95 previous literature?

96 Estimating the net vegetation flux from the whole basin has been elusive. Due to lack of  
97 data some studies are for less than a year, or focus on a few receptor sites. There  
98 seems to be a discrepancy for the SoCAB as to whether the biosphere is a net source  
99 (Newman et al., 2016) or a net sink (Park et al., 2018). The two studies may not be  
100 completely comparable due to different time frames and techniques, but shows that  
101 reasonably determining CO<sub>2</sub> fluxes from biospheric sources remains a challenge (Feng  
102 et al. 2016).

103

104 We assume the flux from vegetation is balanced (i.e., no net change in plant biomass or soil  
105 carbon) within the basin. This choice is because of uncertainty as to whether there is a net uptake  
106 of CO<sub>2</sub> by the biosphere in the SoCAB (Park et al., 2018) or if the excess CO<sub>2</sub> in the atmosphere  
107 from the biosphere (Newman et al., 2016) is due to more respiration than photosynthetic uptake.  
108 We estimate the uncertainty due to the biosphere is less than ±10%.

109

110

111 **R1C8 - P13 L1 & P18 L27:** Why a factor of 64?

112 The factor of 64 for filtering was a somewhat arbitrary choice, but was originally chosen  
113 to exclude few observations. Upon reconsidering, we decided on a factor of 10 in this  
114 revision due to the possibility of a few outliers strongly affecting results. The sensitivity  
115 test in Sect. 4.3 includes changing this factor.

116

117 (Sect. 4.3)

118 We ~~start with a threshold that is a scale from the starting~~ factor of ~~64~~ adjust from there 10× (Appendix  
119 A1).

120

121 (Appendix A1)

122 We also exclude data that differ from the model by a factor of 10 or more. This factor of 10 is  
123 somewhat arbitrary and an argument could be made against using this criterion as a filter.

124 However, a few large outliers can significantly affect inversion results (Appendix D2) so we opt  
125 to remove suspect values. A sensitivity test including different filter cutoffs for TCCON X<sub>CO2</sub> is

126 ~~described in Sect. 4.3. This leaves 2,714~~ After filtering 2,361 paired OCO-2 - AFRC observations  
127 ~~remain.~~

128

129 For TCCON observations we use the public data, which already has some static within-range  
130 filters applied. We also exclude data that differ from the model by a factor of ~~6410~~ or greater,  
131 leaving ~~5,0604,872~~ observations.

132

133

134 **R1C9 - P14 L3:** Where is the 20% uncertainty from model winds discussed? If it isn't  
135 until the appendix, consider referencing that here.

136 Yes, the 20% is from the appendix.

137

138 ~~... and 20% from model winds (Appendix B).~~

139

140

141 **R1C10 - P25 L24:** How was this tuning with OCO-2 observations done?

142 The same way as for the three gases retrieved by TCCON. We've clarified this in the  
143 latest revision.

144

145 For simplicity,  $S_a$  is chosen as a single scalar value for the linear model (Eq. E3). ~~We select~~ We  
146 ~~tune two parameters, namely~~  $S_a$  values which keep the interannual variability under about 25%,  
147 and ~~minimize dependence on~~ the threshold for determining linear independence in the prior as  
148 ~~noted by a sensitivity test scaling the prior (Fig. 7).~~ QR decomposition. This is also a trade-off  
149 between maximizing the degrees of freedom and  $r$ , avoiding unstable conditions, and minimizing  
150  $\chi^2$ . ~~We scan over a variety of~~  $S_a$  and threshold values. We use interannual variability, and  
151 ~~dependence on the prior as noted by a sensitivity test (Fig. 7) to judge the quality. Generally as~~  
152 ~~we increase the threshold fewer elements are allowed in the state vector, the dependence on the~~  
153 ~~prior decreases, and the interannual range increases. As~~  $S_a$  increases, so does the interannual  
154 ~~range, and the dependence on the prior decreases. We select values which keep the interannual~~  
155 ~~variability under about 25%, and minimize dependence on the prior. We repeat this procedure for~~  
156 ~~the three gases retrieved by TCCON, and for OCO-2 observations.~~  $S_a$  is tuned to 0.0701 for CO<sub>2</sub>,  
157 0.007 for CH<sub>4</sub>, 0.00207 for CO, and 0.204 for CO<sub>2</sub> using OCO-2 observations. ~~Generally as~~  $S_a$   
158 ~~increases the interannual range increases, but the dependence on the prior decreases. These~~  
159 ~~values were selected to have the smallest dependence on the prior while keeping the interannual~~  
160 ~~range within our arbitrary 25% limit.~~ For the 40 factor inversion ~~looser constraints are used~~  
161 ~~with~~  $S_a$  is a matrix and diagonal values of CO<sub>2</sub>: 0.7, CH<sub>4</sub>: 0.7, CO: 0.04, and CO<sub>2</sub> (OCO-2): 7 are  
162 ~~the same as the linear inversion.~~ Off-diagonal values between adjacent elements (e.g., years,  
163 months) are one-third of those along the diagonal ~~in the 40 factor inversion~~, which is a somewhat  
164 arbitrary choice based on our a priori guess of how strongly adjacent elements are related.

165

166  
167  
168  
169  
170  
171  
172  
173  
174  
175  
176  
177  
178  
179  
180  
181  
182  
183  
184  
185  
186  
187  
188  
189  
190  
191  
192  
193  
194  
195  
196  
197  
198  
199  
200  
201  
202  
203  
204  
205

**R1C11 - P31 L36: Reference formatted incorrectly**

Fixed, thanks.

**R2C1 - I found the paper to be very informative and thorough, and overall correct as far as I can judge. It does get buried in detail and side alleys and repetitions that make it difficult to read. The authors might consider cutting back unnecessary parts.**

We have reread over the paper with fresh eyes and have tried to better group similar topics and eliminate repetitions. Parts not essential to the central story, but that are required for reproducibility are left in the Appendices.

**R2C2 - Also, the advertised premise of the paper is to demonstrate a simple remote sensing method that can be used for estimating urban fluxes worldwide, which a reader might expect to mean using satellite observations, but in fact much of the analysis rests on the TCCON sites (all of it for methane and CO), and LA is of course an unusually large city which makes the application easier. TCCON is of course “remote sensing”, but the title and conclusions may be a little misleading.**

We modified the advertised premise throughout to lessons learned that will be important for future studies estimating urban fluxes worldwide using satellite observations.

The choice of “remote sensing” in the title was to encompass both satellite and TCCON. However, to try to reduce unintentionally misleading readers we have modified the title to:

Southern California Megacity CO<sub>2</sub>, CH<sub>4</sub>, and CO flux estimates using ground and space-based remote sensing and a Lagrangian model

**R2C3 - Introduction: not obvious why one needs top-down estimate of urban fluxes, particularly for CO<sub>2</sub> where bottom-up estimates (it seems to me) are likely more reliable. It would be good to give some justification of the need for top-down approaches.**

Likely the greatest confidence in emission estimates will be achieved when both bottom-up and top-down approaches agree. Inventories for CO<sub>2</sub> are probably much better than say CH<sub>4</sub>, but there still can be large discrepancies between different inventories (though these might not all be considered “bottom-up”). We’ve added the following paragraph to the introduction:

206 Bottom-up inventories (e.g., of CO<sub>2</sub>) can be derived by accounting for various emission activities  
207 such as transportation, electricity generation, industry, and heating. Bottom-up inventories have  
208 some inherent uncertainty due to imperfect emission models which are largely based on  
209 extrapolation of controlled studies and rely on assumptions of fuel consumption, and from  
210 disagreements in downscaling methods (Duren and Miller, 2012; Sargent et al., 2018).  
211 Uncertainties in how emissions are calculated and in the underlying activity data used to  
212 construct inventories makes them susceptible to systematic biases by nature (Oda et al, 2017).  
213 On the national level, 2σ uncertainties range from 4.0-17.5% for the 10 largest emitters (Oda et  
214 al, 2018). Uncertainties on the grid cell level are unique to the disaggregation method, but may  
215 be in the range of 4—190% (2σ) (Andres et al., 2016). Top-down (TD) emission estimates  
216 methods rely on measurements of gases along with models of atmospheric transport, which have  
217 their own inherent uncertainties. Measures of emissions, and emission changes are generally  
218 more reliable when TD and BU methods are in agreement (Duren and Miller, 2012).

219  
220  
221

222 | **R2C4 - Introduction:** not clear what the “100+ cities” refers to.

223 Here “100+ cities” was our way of being quantitative, but it seems to disrupt the flow.

224

225 but are too sparse to track emissions from ~~100+~~more than a few cities

226

227 are difficult to scale-up to ~~many (100+)~~more than a few dozen areas for long-term observations

228

229

230 | **R2C5 - Section 2.2:** I presume that seasonality of the CO<sub>2</sub> flux is neglected since I saw  
231 no mention of it. It would be worth making the point that the biospheric term is small in  
232 LA, because I wondered about it. Is there also no seasonal pattern in fuel usage?

233 The seasonality in the CO<sub>2</sub> prior flux is driven by seasonality in ODAIC. We’ve added  
234 the following:

235

236 ODIAC has a monthly variation and compared to the annual average, seasonal flux rates are 1.06  
237 (DJF), 0.97 (MAM), 1.00 (JJA), and 0.97 (SON).

238

239 See our response to **R1C7** on the biospheric flux term in LA.

240

241 | **R2C6 - Section 2.4:** if the linear inverse model is the way to go why even mention the  
242 other two models? Why detail them in the Appendix?

243 Mostly because we were curious as to how they would compare in the end. We think  
244 this may be of interest to others in the community so we opted to leave it in.

245

246

247 | **R2C7 - Section 4.1: I didn't understand the sentence on "Blooming effects"**

248 We have revised this part and added a reference.

249

250 ODIAC could be low from incorrectly distributing too much of the emissions to rural areas due  
251 to -Bblooming effects (Small et al., 2005). ~~(exaggerating the extent of cities -Blooming effects~~  
252 ~~refer to the tendency for nightlights to exaggerate settlement areas compared with actual extent~~  
253 ~~due to coarse gridded spatial resolution and indirect or non-electrical lights) in the underlying~~  
254 ~~nightlight data fields in ODAIC could contribute to an incorrect distribution.~~

255

256
